# Supplementary material for: Epigenomic annotation of noncoding mutations identifies mutated pathways in primary liver cancer
Source: PLoS One. 2017 Mar 23;12(3):e0174032. doi: 10.1371/journal.pone.0174032 (PMC5363827; doi:10.1371/journal.pone.0174032)
Supplement: S3 Table — Summary statistics for fold observed/expected SNVs in each ChromHMM-18 state, across 78 cell types. (XLSX) [file pone.0174032.s009.xlsx]

## Sheet: OE ranges
Summary statistics for fold observed/expected SNVs in each ChromHMM-18 state, across 78 cell types
state	min	max	median
1_TssA	1.63093	3.2075	2.51537
2_TssFlnk	1.48787	5.77384	2.2144
3_TssFlnkU	0.615806	2.45308	1.30999
4_TssFlnkD	0.511154	3.17066	1.37538
5_Tx	1.5684	4.64468	2.05933
6_TxWk	0.792324	1.24443	0.976942
7_EnhG1	1.00863	3.81807	1.76873
8_EnhG2	0	10.5442	2.14714
9_EnhA1	0.269943	1.39183	0.707837
10_EnhA2	0.55707	2.0756	0.902854
11_EnhWk	0.586465	1.05244	0.814993
12_ZNF-Rep	0.993841	4.45865	1.40531
13_Het	0.734549	1.68342	1.22733
14_TssBiv	0	6.45711	2.61539
15_EnhBiv	0	8.32324	1.36123
16_ReprPc	0	3.43869	1.29155
17_ReprPcWk	0.717325	1.36449	0.94032
18_Quies	0.814718	0.955802	0.916686
